# Supplementary material for: Metal extraction from a deep eutectic solvent, an insight into activities
Source: Royal Society of Chemistry journal article supplement (doi:10.1039/c9cp05982b), 2020-01-01
Supplement: c9cp05982b1.pdf [file c9cp05982b1.pdf]

Annex: Symbols used and the units associated with them.

Normal letters

|                 |                                                                                                 |                                                   |
|-----------------|-------------------------------------------------------------------------------------------------|---------------------------------------------------|
| a               | Activity                                                                                        | Mole dm <sup>-3</sup>                             |
| A               | Debye-Huckel term                                                                               | Mole <sup>0.5</sup> kg <sup>0.5</sup>             |
| b               | Term in the denominator of the extended Debye-Huckel equation                                   |                                                   |
| B               | Term in the SIT or Pitzer equation                                                              | Mole <sup>-1</sup> kg                             |
| c               | Concentration                                                                                   | Mole dm <sup>-3</sup>                             |
| C               | Term in the polynomial of the Pitzer equation                                                   | Mole <sup>-2</sup> kg <sup>2</sup>                |
| C               | Constant containing activity factors in the organic phase together with chloride concentrations | Varies                                            |
| D               | Term in the polynomial of the Pitzer equation                                                   | Mole <sup>-3</sup> kg <sup>3</sup>                |
| D <sub>M</sub>  | Distribution ratio                                                                              | Unitless                                          |
| E               | Energy                                                                                          | Joules                                            |
| f               | Activity function                                                                               | Unitless                                          |
| I               | Ionic strength                                                                                  | mole dm <sup>-3</sup>                             |
| I <sub>m</sub>  | Ionic strength expressed using molality                                                         | mole kg <sup>-1</sup>                             |
| k               | Miscellaneous constant                                                                          | <i>as needed</i>                                  |
| k'              | Miscellaneous constant                                                                          | <i>as needed</i>                                  |
| k <sub>b</sub>  | Boltzmann constant                                                                              | m <sup>2</sup> kg s <sup>-2</sup> K <sup>-1</sup> |
| K <sub>n</sub>  | Thermodynamic stability constant                                                                | mol <sup>-1</sup> dm <sup>3</sup>                 |
| K <sub>d</sub>  | Distribution constant                                                                           | Unitless                                          |
| K <sub>ex</sub> | Extraction constant                                                                             | Unitless                                          |
| K <sub>s</sub>  | Sechenov constant                                                                               | Moles dm <sup>-3</sup>                            |
| m               | Molality of substance                                                                           | Moles kg <sup>-1</sup>                            |
| m <sub>k</sub>  | Molality of species k                                                                           | Moles kg <sup>-1</sup>                            |
| n               | Number of ions in a given volume                                                                | Ions m <sup>-3</sup>                              |
| r               | Radius                                                                                          | m                                                 |
| R               | Gas constant                                                                                    | J mol <sup>-1</sup> K <sup>-1</sup>               |
| T               | Temperature                                                                                     | Kelvin                                            |
| z               | Charge on an ion (multiples of the electronic charge)                                           | e                                                 |

Greek letters

|                |                                                                          |                                    |
|----------------|--------------------------------------------------------------------------|------------------------------------|
| β              | Cumulative thermodynamic stability constant                              | Varies                             |
| γ              | Activity coefficient                                                     | Unitless                           |
| ΔX             | Change in X, X is used here as a placeholder                             | None                               |
| ε(j,k)         | SIT parameter for the interaction of ions j and k                        | mole <sup>-1</sup> dm <sup>3</sup> |
| ε <sub>0</sub> | Vacuum permittivity                                                      | C V <sup>-1</sup> m <sup>-1</sup>  |
| ε <sub>r</sub> | Relative                                                                 | Unitless                           |
| μ              | Chemical potential                                                       | J mol <sup>-1</sup>                |
| θ              | Deep eutectic solvent volume fraction                                    | Unitless                           |
| Ψ              | Constant to take into account fraction of lower phase which is not water | Unitless                           |
